# Supplementary material
Source: PubMed Central journal article supplement (PMC2651336)
Supplement: 0810291106_SD1_PDF.pdf [file 0810291106_SD1_PDF.pdf]

**Table S1.** Genes of PhyR, NepR and  $\sigma^{\text{Ec}fG1}$  regulons.

| Accession <sup>a</sup> | Product <sup>b</sup>                                                       | Fold change<br>phyROE/ $\Delta$ phyR <sup>c</sup> | Fold change<br>nepR OE/WT <sup>c</sup> | Fold change<br>$\Delta$ ecfG1/WT <sup>c</sup> |
|------------------------|----------------------------------------------------------------------------|---------------------------------------------------|----------------------------------------|-----------------------------------------------|
| RMQ00044               | MxaJ                                                                       |                                                   | 4.67                                   |                                               |
| RMQ00070               | putative carboxymethylenebutenolidase precursor                            | 2.01                                              | -3.35                                  |                                               |
| RMQ00080               | conserved exported protein of unknown function                             | 2.21                                              |                                        |                                               |
| RMQ00081               | conserved exported protein of unknown function                             | 2.05                                              |                                        |                                               |
| RMQ00096               | not present in the current version of the genome                           |                                                   | 3.68                                   |                                               |
| RMQ00233               | exported protein of unknown function                                       | 20.39                                             |                                        |                                               |
| RMQ00302               | hypothetical protein                                                       |                                                   | -2.67                                  |                                               |
| RMQ00306               | conserved protein of unknown function                                      |                                                   | -3.24                                  | -3.38                                         |
| RMQ00307               | molybdate transport protein (ABC superfamily, periplasmic binding protein) | 2.61                                              | -2.75                                  |                                               |
| RMQ00397               | 6-phosphogluconolactonase                                                  | 2.24                                              |                                        |                                               |
| RMQ00462               | putative ferredoxin; 4Fe-4S ferredoxin domain                              | 2.27                                              |                                        |                                               |
| RMQ00481               | conserved exported protein of unknown function                             | -3.44                                             |                                        |                                               |
| RMQ00491               | 3-methyl-2-oxobutanoate hydroxymethyltransferase                           | 3.63                                              |                                        |                                               |
| RMQ00507               | conserved protein of unknown function                                      | 4.29                                              |                                        |                                               |
| RMQ00525               | heat shock protein DnaJ domain protein                                     | 2.28                                              |                                        |                                               |
| RMQ00598               | conserved protein of unknown function                                      | 2.90                                              |                                        |                                               |
| RMQ00690               | conserved protein of unknown function                                      | 13.42                                             | -6.93                                  |                                               |
| RMQ00737               | conserved exported protein of unknown function                             | 4.59                                              |                                        |                                               |
| RMQ00842               | putative alcohol dehydrogenase                                             | 3.56                                              | -2.88                                  |                                               |
| RMQ01090               | conserved protein of unknown function                                      | 22.76                                             | -8.40                                  | -7.35                                         |
| RMQ01091               | conserved protein of unknown function                                      | 4.37                                              | -6.87                                  | -2.90                                         |
| RMQ01100               | hypothetical protein                                                       |                                                   | -2.67                                  |                                               |
| RMQ01108               | hypothetical protein                                                       |                                                   | -6.39                                  |                                               |
| RMQ01226               | conserved protein of unknown function                                      |                                                   | -6.53                                  |                                               |
| RMQ01233               | conserved protein of unknown function                                      | 2.19                                              | -2.79                                  |                                               |
| RMQ01240               | putative NAD-dependent alcohol dehydrogenase                               | 3.48                                              | -2.77                                  |                                               |
| RMQ01306               | aldehyde oxidase, small subunit                                            | 3.94                                              | -3.82                                  |                                               |
| RMQ01341               | conserved protein of unknown function                                      | 3.38                                              | -2.93                                  |                                               |
| RMQ01360               | cobalamin synthase                                                         |                                                   | 2.78                                   |                                               |
| RMQ01385               | conserved protein of unknown function                                      | 2.86                                              |                                        | -3.40                                         |
| RMQ01392               | conserved protein of unknown function                                      | 3.14                                              |                                        |                                               |
| RMQ01397               | conserved exported protein of unknown function                             | 2.10                                              | -2.75                                  |                                               |
| RMQ01469               | conserved protein of unknown function                                      | 3.18                                              | -2.95                                  |                                               |
| RMQ01535               | conserved protein of unknown function                                      | 4.91                                              | -3.65                                  |                                               |
| RMQ01575               | lactoylglutathione lyase, homolog <i>gloA</i>                              | 4.92                                              | -3.65                                  | -2.06                                         |
| RMQ01613               | conserved protein of unknown function                                      | 2.10                                              |                                        |                                               |
| RMQ01724               | indole-3-glycerol phosphate synthase                                       | 2.51                                              |                                        |                                               |
| RMQ01745               | conserved protein of unknown function                                      | 2.21                                              |                                        |                                               |
| RMQ01804               | conserved membrane protein of unknown function                             |                                                   | -2.73                                  |                                               |
| RMQ01837               | transporter, hydrophobe/amphiphile efflux-1 (HAE1) family                  |                                                   | -3.43                                  |                                               |
| RMQ01983               | conserved protein of unknown function                                      | 4.27                                              |                                        |                                               |
| RMQ01992               | conserved exported protein of unknown function                             | 6.08                                              | -3.21                                  |                                               |
| RMQ01993               | putative short-chain dehydrogenase/reductase SDR                           | 2.58                                              | -2.65                                  |                                               |
| RMQ02025               | conserved protein of unknown function                                      | 3.51                                              |                                        |                                               |
| RMQ02095               | conserved protein of unknown function                                      | 2.12                                              |                                        |                                               |
| RMQ02125               | conserved exported protein of unknown function                             | 5.45                                              |                                        |                                               |
| RMQ02213               | conserved membrane protein of unknown function                             |                                                   | -7.21                                  |                                               |
| RMQ02236               | conserved protein of unknown function,                                     | 2.69                                              | -3.86                                  |                                               |
| RMQ02287               | ATP-dependent urea carboxylase                                             | 2.08                                              |                                        |                                               |
| RMQ02294               | hypothetical protein                                                       |                                                   | -5.05                                  |                                               |
| RMQ02318               | conserved protein of unknown function                                      | 2.29                                              |                                        |                                               |
| RMQ02358               | hypothetical protein                                                       | 2.63                                              |                                        |                                               |
| RMQ02426               | conserved protein of unknown function                                      |                                                   | -4.00                                  |                                               |
| RMQ02551               | cytochrome c SoxX precursor                                                |                                                   | 2.85                                   |                                               |

|                   |                                                                         |       |        |       |
|-------------------|-------------------------------------------------------------------------|-------|--------|-------|
| RMQ02552          | sulfur oxidation protein SoxY precursor                                 |       | 3.64   |       |
| RMQ02553          | sulfur oxidation protein, SoxZ                                          |       | 3.51   |       |
| RMQ02591          | conserved exported protein of unknown function                          | 3.43  |        |       |
| RMQ02643          | flavoprotein WrbA                                                       |       | -2.80  |       |
| RMQ02661          | conserved protein of unknown function                                   | 2.92  | -2.78  |       |
| RMQ02662          | citrate and C4-dicarboxylic acids transport protein (DAACS family)      |       | -94.46 |       |
| RMQ02696          | hypothetical protein                                                    |       | -7.09  |       |
| RMQ02712          | conserved exported protein of unknown function                          | 4.12  | -3.07  |       |
| RMQ02752          | conserved protein of unknown function n                                 | 3.94  |        |       |
| RMQ02783          | conserved protein of unknown function                                   |       | -5.20  |       |
| RMQ02810          | putative UDP-glucose 4-epimerase                                        |       | 4.32   |       |
| RMQ02811          | putative UDP-N-acetyl-D-mannosaminuronic acid dehydrogenase             |       | 4.63   |       |
| RMQ02863          | conserved protein of unknown function                                   |       | -4.24  |       |
| RMQ02886          | conserved membrane protein of unknown function                          | 18.57 | -9.80  | -7.26 |
| RMQ02894          | lactoylglutathione lyase, homolog <i>gloA</i>                           | 6.12  | -4.39  | -2.69 |
| RMQ02947          | conserved membrane protein of unknown function                          | -2.65 |        |       |
| RMQ02981          | fragment of component of DNA polymerase V, subunit C                    | 2.01  |        |       |
| RMQ02984          | conserved protein of unknown function                                   | 4.81  | -3.43  |       |
| RMQ03023          | conserved protein of unknown function                                   | 3.55  |        |       |
| RMQ03028          | putative <i>nosX</i> precursor (nitrous oxide reductase)                |       | 3.42   |       |
| RMQ03030          | not present in the current version of the genome                        |       | 3.55   |       |
| RMQ03083          | conserved exported protein of unknown function                          | 5.28  | -3.66  |       |
| RMQ03118          | hypothetical protein                                                    | 2.71  |        |       |
| RMQ03130          | conserved exported protein of unknown function                          | 3.29  | -4.20  |       |
| RMQ03141          | FAD-binding molybdopterin oxidoreductase, xanthine dehydrogenase family |       | -3.00  | -2.48 |
| RMQ03175          | conserved exported protein of unknown function                          |       | 9.25   |       |
| RMQ03181          | hypothetical protein                                                    |       | -3.49  |       |
| RMQ03182          | conserved protein of unknown function                                   |       | -2.73  |       |
| RMQ03206          | conserved protein of unknown function                                   | 2.59  |        |       |
| RMQ03219          | intergenic region                                                       |       | 6.06   |       |
| RMQ03299          | hypothetical protein                                                    |       | -3.30  |       |
| RMQ03305          | conserved membrane protein of unknown function                          | 2.46  |        |       |
| RMQ03317          | conserved exported protein of unknown function                          |       | 2.53   |       |
| RMQ03446/RMQ10940 | hypothetical protein                                                    |       | 3.65   | -2.13 |
| RMQ03452          | aldehyde dehydrogenase                                                  |       | 2.59   |       |
| RMQ03453          | putative methyl-accepting chemotaxis receptor/sensory transducer        | -2.45 |        |       |
| RMQ03468          | conserved exported protein of unknown function                          | 4.78  | -2.95  |       |
| RMQ03480          | hypothetical protein                                                    |       | -4.25  |       |
| RMQ03481          | hypothetical protein                                                    |       | -3.46  |       |
| RMQ03482          | hypothetical protein                                                    |       | -2.59  |       |
| RMQ03504          | conserved exported protein of unknown function                          | 3.62  |        | -2.22 |
| RMQ03693          | conserved protein of unknown function                                   |       | -4.43  |       |
| RMQ03694          | hypothetical protein                                                    |       | -3.59  |       |
| RMQ03702          | putative alpha/beta hydrolase precursor                                 | 3.46  | -3.18  |       |
| RMQ03741          | putative ethanolamine ammonia-lyase light chain ( <i>eutC</i> -like)    | 2.10  |        |       |
| RMQ03785          | conserved exported protein of unknown function                          | 2.33  |        |       |
| RMQ03873          | phage-related lysozyme (muramidase, endolysin)                          |       | -3.44  |       |
| RMQ03874          | conserved protein of unknown function                                   | 3.06  | -3.13  |       |
| RMQ03888          | hypothetical protein                                                    | 3.26  |        |       |
| RMQ04144          | MxaS protein, involved in methanol oxidation                            |       | 2.95   |       |
| RMQ04209          | not present in the current version of the genome                        |       | 13.03  |       |
| RMQ04256          | Protein MoxR                                                            |       | 4.08   |       |
| RMQ04294          | hypothetical protein                                                    | 2.49  | -3.79  |       |
| RMQ04612          | MxaH                                                                    |       | 2.72   |       |
| RMQ04652          | putative General stress protein 26                                      | 3.77  | -3.57  |       |
| RMQ04657          | 50S ribosomal subunit protein L34                                       |       |        | 2.14  |
| RMQ04669          | conserved protein of unknown function                                   |       | -3.32  |       |
| RMQ04750          | conserved exported protein of unknown function                          | 3.00  |        |       |
| RMQ04755          | conserved exported protein of unknown function                          | 2.84  | -3.01  |       |
| RMQ04760          | conserved exported protein of unknown function                          | 11.91 | -5.37  |       |
| RMQ04786          | conserved protein of unknown function                                   | 10.34 | -6.31  |       |
| RMQ04838          | conserved protein of unknown function                                   |       | -2.93  |       |
| RMQ04913          | conserved membrane protein of unknown function                          | 2.84  |        |       |

|          |                                                                          |       |       |       |
|----------|--------------------------------------------------------------------------|-------|-------|-------|
| RMQ04997 | putative glycosyl transferase                                            | 2.20  |       |       |
| RMQ04999 | phytoene desaturase                                                      | 2.23  |       |       |
| RMQ05003 | conserved protein of unknown function                                    | 4.73  | -4.82 | -7.94 |
| RMQ05011 | conserved exported protein of unknown function                           |       | 3.18  |       |
| RMQ05038 | conserved protein of unknown function                                    | 2.26  |       |       |
| RMQ05040 | conserved exported protein of unknown function                           | 3.23  |       |       |
| RMQ05047 | putative sucrose-phosphate synthase                                      | 15.88 | -4.21 |       |
| RMQ05048 | conserved exported protein of unknown function                           | 10.10 | -3.54 |       |
| RMQ05080 | conserved exported protein of unknown function                           |       | 2.57  |       |
| RMQ05082 | putative metallo-beta-lactamase family protein                           |       | 2.58  |       |
| RMQ05169 | putative oxidoreductase, 2Fe-2S subunit, homolog <i>yagT</i>             | 10.52 | -6.03 |       |
| RMQ05187 | transposase of ISMex18, IS630 family                                     |       | -2.63 |       |
| RMQ05201 | putative hemolysin III, HlyIII family                                    | 2.68  |       |       |
| RMQ05207 | putative glucokinase (glucose kinase)                                    | 2.68  |       |       |
| RMQ05214 | conserved protein of unknown function                                    | -2.00 |       |       |
| RMQ05231 | hypothetical protein                                                     | 2.08  |       |       |
| RMQ05258 | Dps protein family, starvation-inducible DNA-binding protein             | 12.08 | -7.66 | -5.66 |
| RMQ05266 | MxaA protein                                                             |       | 3.26  |       |
| RMQ05267 | MxaL protein precursor                                                   |       | 3.28  |       |
| RMQ05268 | MxaD protein precursor                                                   |       | 3.97  |       |
| RMQ05310 | small heat shock protein                                                 | 2.77  |       | -2.38 |
| RMQ05336 | putative cytochrome P450 hydroxylase superfamily proteins                | 2.52  |       |       |
| RMQ05362 | putative isomerase                                                       | 2.63  |       |       |
| RMQ05378 | conserved protein of unknown function                                    | 9.51  | -7.29 |       |
| RMQ05440 | protein CsaA                                                             | 2.49  |       |       |
| RMQ05442 | conserved protein of unknown function                                    | 9.16  | -5.52 |       |
| RMQ05463 | putative short-chain specific acyl-CoA dehydrogenase                     | 2.71  |       |       |
| RMQ05500 | putative NAD(FAD)-dependent oxidoreductase                               | 3.45  | -2.88 |       |
| RMQ05501 | putative cytochrome P450 reductase                                       | 2.57  |       |       |
| RMQ05519 | putative general stress protein, intracellular proteinase                |       | -2.64 |       |
| RMQ05611 | conserved protein of unknown function                                    | 2.27  |       |       |
| RMQ05758 | conserved exported protein of unknown function                           | 5.13  | -3.37 |       |
| RMQ05759 | conserved protein of unknown function                                    | 3.69  | -4.40 |       |
| RMQ05823 | H <sup>+</sup> /gluconate symporter family protein                       |       | -2.54 |       |
| RMQ05835 | putative CsbD-like general stress response protein                       | 6.32  | -3.07 |       |
| RMQ05855 | putative response regulator receiver (CheY-like protein)                 | 4.59  |       |       |
| RMQ05890 | conserved protein of unknown function                                    |       | 2.83  |       |
| RMQ05904 | glycogen debranching enzyme, homolog <i>glgX</i>                         | 6.99  | -4.43 | -4.19 |
| RMQ05931 | homolog of <i>moxR</i>                                                   | 2.09  |       |       |
| RMQ05963 | conserved exported protein of unknown function                           |       | -2.58 |       |
| RMQ05964 | methanol dehydrogenase subunit 2 precursor (MDH small beta subunit)      |       | 5.74  |       |
| RMQ05965 | cytochrome c-L precursor.                                                |       | 3.73  |       |
| RMQ05966 | methanol dehydrogenase subunit 1 precursor (MDH large alpha subunit)     |       | 3.94  |       |
| RMQ05968 | homolog <i>copZ</i> ; heavy metal transport/detoxification protein       | 2.42  |       |       |
| RMQ06017 | putative short-chain dehydrogenase/reductase SDR                         |       | -2.98 | -5.32 |
| RMQ06018 | zinc-containing alcohol dehydrogenase                                    | 8.38  | -5.28 |       |
| RMQ06097 | inositol-3-phosphate synthase                                            |       |       | -5.06 |
| RMQ06119 | conserved exported protein of unknown function                           |       | -3.73 |       |
| RMQ06199 | putative ethyl tert-butyl ether degradation EthD                         | 4.13  | -2.79 |       |
| RMQ06200 | conserved protein of unknown function                                    | 3.20  | -2.72 |       |
| RMQ06202 | conserved exported protein of unknown function                           |       | 2.59  |       |
| RMQ06210 | hypothetical protein; putative membrane protein; putative signal peptide | 12.88 | -7.22 | -3.76 |
| RMQ06253 | conserved exported protein of unknown function                           |       | 2.81  |       |
| RMQ06268 | conserved membrane protein of unknown function                           | 6.52  | -3.50 |       |
| RMQ06294 | acyl-CoA dehydrogenase                                                   | -2.01 |       |       |
| RMQ06296 | putative general secretory pathway protein K                             | 2.83  |       |       |
| RMQ06350 | conserved protein of unknown function                                    |       | -3.64 |       |
| RMQ06351 | conserved exported protein of unknown function                           | 8.19  | -4.09 |       |
| RMQ06376 | conserved exported protein of unknown function                           |       | 2.86  |       |
| RMQ06387 | conserved exported protein of unknown function                           | 2.16  |       |       |
| RMQ06389 | conserved protein of unknown function                                    | 3.01  |       |       |
| RMQ06428 | putative homoserine O-succinyltransferase ( <i>metA</i> )                |       | 4.18  |       |
| RMQ06473 | exported protein of unknown function                                     |       |       | -2.89 |

|                   |                                                                                   |       |        |        |
|-------------------|-----------------------------------------------------------------------------------|-------|--------|--------|
| RMQ06481          | MxB                                                                               |       | 2.72   |        |
| RMQ06496          | intergenic region                                                                 |       | 2.61   |        |
| RMQ06545          | conserved protein of unknown function                                             | 3.36  |        |        |
| RMQ06593          | ribonuclease BN                                                                   |       | -2.86  |        |
| RMQ06609          | conserved protein of unknown function                                             | 3.21  |        |        |
| RMQ06676          | glucose-6-phosphate 1-dehydrogenase (G6PD)                                        | 3.34  | -3.43  |        |
| RMQ06685          | conserved exported protein of unknown function                                    | 4.60  | -2.54  |        |
| RMQ06706          | putative glutathione S-transferase                                                | 4.69  | -3.22  | -2.21  |
| RMQ06759          | conserved protein of unknown function                                             | 2.01  |        |        |
| RMQ06760          | OsmC/Ohr family                                                                   | 11.28 | -6.03  |        |
| RMQ06780          | carbonic anhydrase                                                                | 2.69  |        |        |
| RMQ06786          | conserved protein of unknown function                                             |       | 3.02   |        |
| RMQ06868          | (S)-2-haloacid dehalogenase IVA                                                   | 3.30  | -3.04  |        |
| RMQ06939          | membrane protein of unknown function                                              | 3.03  |        |        |
| RMQ06958          | malyl-CoA lyase, beta-methylmalyl-CoA lyase                                       | 2.05  |        |        |
| RMQ06981          | conserved protein of unknown function                                             | 2.11  |        |        |
| RMQ06982          | chaperone Hsp70                                                                   | 2.47  |        |        |
| RMQ06983          | upstream RMQ06982                                                                 | 3.22  |        |        |
| RMQ07012          | putative alpha-amylase-related protein;                                           | 4.09  | -4.45  |        |
| RMQ07013/RMQ11793 | putative glycosyl hydrolase (modular protein), homolog <i>malQ</i>                | 2.94  | -2.72  | -2.20  |
| RMQ07043          | conserved exported protein of unknown function                                    | 8.90  | -4.84  |        |
| RMQ07050          | conserved exported protein of unknown function                                    | 7.19  | -2.54  |        |
| RMQ07057          | putative oxidoreductase with molybdenum-binding domain; <i>yagR</i> homolog       | 7.27  | -4.02  |        |
| RMQ07088          | manganese catalase                                                                |       | -2.61  |        |
| RMQ07135          | conserved exported protein of unknown function                                    | 2.35  |        |        |
| RMQ07136          | putative HAD-superfamily hydrolase, subfamily IA, variant 1                       | 2.62  | -2.55  |        |
| RMQ07142/RMQ11717 | PQQ-dependent aldose sugar dehydrogenase precursor ( <i>asd</i> ), signal peptide | 2.90  | -3.09  | -2.66  |
| RMQ07147          | conserved protein of unknown function                                             | 3.21  |        |        |
| RMQ07236          | hypothetical protein                                                              | 4.43  |        |        |
| RMQ07291          | two component sensor histidine kinase, RegS                                       | 2.50  |        |        |
| RMQ07349          | conserved protein of unknown function                                             | 2.02  |        |        |
| RMQ07364          | conserved exported protein of unknown function                                    | 6.11  | -3.58  |        |
| RMQ07462          | conserved protein of unknown function                                             | 8.54  |        |        |
| RMQ07560          | putative oxidoreductase with molybdenum-binding domain; <i>yagR</i> homolog       | 7.02  | -5.60  | -4.23  |
| RMQ07561          | putative homolog <i>yagS</i> ; oxidoreductase, with FAD-binding domain            |       | -3.53  |        |
| RMQ07562          | putative homolog <i>yagT</i> ; oxidoreductase, 2Fe-2S subunit                     | 2.38  |        |        |
| RMQ07637          | conserved protein of unknown function                                             | 10.13 | -4.25  |        |
| RMQ07641          | conserved protein of unknown function                                             | 11.43 | -16.44 | -4.15  |
| RMQ07715          | conserved protein of unknown function                                             |       | -2.97  |        |
| RMQ07749          | protein of unknown function                                                       | 5.77  |        |        |
| RMQ07760          | conserved protein of unknown function                                             | 2.08  |        |        |
| RMQ07767          | putative 3-ketoacyl-acyl carrier protein reductase                                | 5.56  | -4.27  |        |
| RMQ07799          | putative glucose dehydrogenase, NAD(P)-binding domain                             | 3.61  | -5.07  | -8.63  |
| RMQ07805          | putative conserved oxidoreductase, Zn-dependent and NAD(P)-binding                |       | -3.24  |        |
| RMQ07827          | conserved protein of unknown function                                             | 3.40  |        |        |
| RMQ07854          | hypothetical protein                                                              | 3.05  |        |        |
| RMQ07859          | conserved protein of unknown function                                             | 4.75  | -3.88  |        |
| RMQ07890          | putative glycoside hydrolase                                                      | 5.41  | -3.30  |        |
| RMQ07946          | putative sulfite oxidase cytochrome subunit ( <i>SoxD</i> )                       |       | 3.02   |        |
| RMQ07947          | sulfite oxidase precursor                                                         |       | 3.30   |        |
| RMQ07949          | sulfur/thiosulfate oxidation protein SoxB                                         |       | 3.17   |        |
| RMQ07950          | di-heme cytochrome c, sulfur oxidizing protein SoxA                               |       | 3.38   |        |
| RMQ08015          | conserved protein of unknown function                                             | 4.48  | -7.75  |        |
| RMQ08023          | conserved membrane protein of unknown function                                    | 2.26  |        |        |
| RMQ08034          | conserved exported protein of unknown function                                    |       | -3.36  |        |
| RMQ08055          | transposase of ISMex39, IS21 family (ORF 1)                                       | 3.99  |        |        |
| RMQ08101          | conserved protein of unknown function                                             | 3.42  |        |        |
| RMQ08114          | intergenic region                                                                 | -2.32 |        |        |
| RMQ08139          | putative regulatory protein, Crp/Fnr family of transcriptional regulators         | 24.56 | -6.36  | -10.18 |
| RMQ08147          | ECF sigma factor, $\sigma^{\text{EdG1}}$                                          |       |        | -11.30 |
| RMQ08162          | intergenic region                                                                 | 3.04  |        |        |
| RMQ08181          | conserved exported protein of unknown function                                    | 3.92  |        |        |
| RMQ08196          | conserved exported protein of unknown function                                    | 4.50  | -5.03  |        |

|          |                                                                |        |        |       |
|----------|----------------------------------------------------------------|--------|--------|-------|
| RMQ08197 | hypothetical protein                                           | 10.47  |        |       |
| RMQ08198 | PhyR                                                           | 186.10 |        |       |
| RMQ08214 | conserved protein of unknown function                          | 4.05   | -2.75  |       |
| RMQ08235 | conserved protein of unknown function                          | 6.73   | -3.69  |       |
| RMQ08244 | conserved protein of unknown function                          |        | 2.76   |       |
| RMQ08277 | putative response regulator, CheY- like and LuxR domain        |        | 2.63   |       |
| RMQ08341 | putative transcriptional regulator MucR                        | -2.57  |        |       |
| RMQ08351 | putative ECF sigma factor                                      |        | 3.06   |       |
| RMQ08352 | conserved protein of unknown function                          |        | 2.73   |       |
| RMQ08370 | hypothetical protein; putative exported protein                | 2.11   |        |       |
| RMQ08447 | hypothetical protein                                           | 3.94   | -3.38  |       |
| RMQ08448 | intergenic region                                              |        | -3.89  |       |
| RMQ08453 | conserved protein of unknown function                          |        | -2.96  |       |
| RMQ08497 | conserved protein of unknown function                          | -3.92  |        |       |
| RMQ08560 | conserved membrane protein of unknown function                 | 16.16  | -4.22  |       |
| RMQ08624 | putative maltooligosyltrehalose trehalohydrolase               | 5.92   | -3.45  | -3.06 |
| RMQ08625 | conserved protein of unknown function                          |        | 2.98   |       |
| RMQ08659 | conserved protein of unknown function                          | 4.97   |        |       |
| RMQ08660 | conserved exported protein of unknown function                 | 4.02   |        |       |
| RMQ08663 | conserved protein of unknown function                          | 2.29   |        |       |
| RMQ08668 | conserved protein of unknown function                          | 10.75  | -4.26  |       |
| RMQ08674 | conserved exported protein of unknown function                 |        | -3.12  |       |
| RMQ08723 | hypothetical protein                                           | 4.72   |        |       |
| RMQ08756 | intergenic region                                              | 2.15   |        |       |
| RMQ08772 | cytochrome c                                                   | 2.29   |        |       |
| RMQ08861 | conserved exported protein of unknown function                 | 14.14  | -5.68  | -4.41 |
| RMQ08870 | conserved protein of unknown function                          |        | -3.27  |       |
| RMQ08960 | conserved membrane protein of unknown function                 |        | -3.86  |       |
| RMQ08994 | conserved protein of unknown function                          | 5.01   |        |       |
| RMQ09032 | protein of unknown function                                    | 7.63   |        |       |
| RMQ09041 | intergenic region                                              | 4.61   | -2.77  |       |
| RMQ09049 | putative prokaryotic transcription elongation factor GreA/GreB | 9.57   | -3.77  | -2.52 |
| RMQ09058 | conserved protein of unknown function                          | 5.57   |        |       |
| RMQ09060 | putative serine protease, <i>htrA</i> -like                    | 3.54   | -2.62  |       |
| RMQ09061 | putative RNA polymerase ECF-type sigma factor                  | 2.65   |        |       |
| RMQ09070 | conserved exported protein of unknown function                 | 2.21   |        |       |
| RMQ09084 | intergenic region                                              | -2.48  |        |       |
| RMQ09144 | conserved protein of unknown function                          | 11.11  | -4.54  |       |
| RMQ09333 | conserved protein of unknown function                          | 2.54   |        |       |
| RMQ09336 | conserved exported protein of unknown function                 |        | -7.83  |       |
| RMQ09337 | putative TonB-dependent siderophore receptor                   |        | -23.95 |       |
| RMQ09338 | conserved protein of unknown function                          | 3.72   | -2.61  |       |
| RMQ09362 | conserved exported protein of unknown function                 | 5.05   |        |       |
| RMQ09396 | hypothetical protein; putative exported protein;               | -2.10  |        |       |
| RMQ09432 | RMQ02068, opposite                                             |        | 3.12   |       |
| RMQ09450 | conserved protein of unknown function                          | 5.70   | -3.33  | -2.25 |
| RMQ09476 | intergenic region                                              | -2.64  |        |       |
| RMQ09483 | conserved exported protein of unknown function                 | 2.10   |        |       |
| RMQ09517 | conserved membrane protein of unknown function                 |        | -2.59  |       |
| RMQ09532 | conserved protein of unknown function                          | 4.19   | -2.78  |       |
| RMQ09549 | Catalase, <i>katE</i>                                          | 10.24  | -7.39  | -7.88 |
| RMQ09560 | hypothetical protein                                           | 3.76   |        | -2.30 |
| RMQ09562 | hypothetical protein                                           | 2.58   |        |       |
| RMQ09593 | mechanosensitive channel                                       | 5.14   | -4.42  |       |
| RMQ09662 | intergenic region                                              | -2.16  |        |       |
| RMQ09670 | conserved exported protein of unknown function                 | 2.28   |        |       |
| RMQ09676 | conserved exported protein of unknown function                 |        | -2.77  |       |
| RMQ09694 | conserved exported protein of unknown function                 | 2.43   | -3.32  |       |
| RMQ09695 | conserved protein of unknown function                          | 2.36   | -2.77  |       |
| RMQ09700 | conserved exported protein of unknown function                 |        | 3.96   |       |
| RMQ09746 | intergenic region                                              | -2.64  |        |       |
| RMQ09748 | intergenic region                                              | -2.26  |        |       |
| RMQ09759 | 1,4-alpha-glucan-branching enzyme, glycogen synthesis          | 3.73   |        |       |

|          |                                                                           |       |       |        |
|----------|---------------------------------------------------------------------------|-------|-------|--------|
| RMQ09763 | hypothetical protein; putative exported protein                           | 3.41  |       |        |
| RMQ09764 | conserved protein of unknown function                                     | 4.28  |       |        |
| RMQ09773 | hypothetical protein                                                      | 2.44  |       |        |
| RMQ09869 | conserved exported protein of unknown function                            |       | 55.60 |        |
| RMQ10020 | conserved protein of unknown function                                     | 6.46  |       | -3.08  |
| RMQ10072 | dehydrogenase DhgA                                                        | 3.41  |       | -2.60  |
| RMQ10186 | conserved protein of unknown function                                     |       |       | 2.78   |
| RMQ10187 | conserved protein of unknown function                                     |       |       | 2.76   |
| RMQ10192 | hypothetical protein                                                      | 3.64  |       |        |
| RMQ10257 | conserved protein of unknown function                                     | 3.97  |       | -3.50  |
| RMQ10327 | conserved protein of unknown function                                     | 4.28  |       | -3.02  |
| RMQ10363 | hypothetical protein                                                      | -2.12 |       |        |
| RMQ10447 | hypothetical protein                                                      |       |       | -3.18  |
| RMQ10448 | conserved protein of unknown function                                     | 2.38  |       | -5.23  |
| RMQ10449 | hypothetical protein                                                      |       |       | -3.82  |
| RMQ10450 | intergenic region                                                         |       |       | -6.72  |
| RMQ10452 | hypothetical protein                                                      |       |       | -5.07  |
| RMQ10453 | hypothetical protein                                                      |       |       | -5.26  |
| RMQ10454 | hypothetical protein                                                      |       |       | -4.05  |
| RMQ10455 | hypothetical protein                                                      | 2.32  |       | -4.82  |
| RMQ10456 | intergenic region                                                         |       |       | -8.80  |
| RMQ10457 | hypothetical protein                                                      |       |       | -6.84  |
| RMQ10459 | hypothetical protein                                                      |       |       | -3.32  |
| RMQ10463 | intergenic region                                                         |       |       | -4.06  |
| RMQ10465 | hypothetical protein                                                      |       |       | -4.20  |
| RMQ10469 | hypothetical protein                                                      |       |       | -2.51  |
| RMQ10470 | hypothetical protein                                                      |       |       | -2.60  |
| RMQ10471 | hypothetical protein                                                      |       |       | -3.87  |
| RMQ10472 | phage-type terminase, large subunit, PBSX                                 |       |       | -3.23  |
| RMQ10473 | HNH endonuclease family protein                                           |       |       | -3.64  |
| RMQ10474 | hypothetical protein                                                      |       |       | -3.53  |
| RMQ10475 | conserved protein of unknown function                                     |       |       | -3.78  |
| RMQ10477 | hypothetical protein                                                      |       |       | -2.77  |
| RMQ10478 | hypothetical protein                                                      |       |       | -3.06  |
| RMQ10479 | conserved protein of unknown function                                     |       |       | -4.30  |
| RMQ10480 | hypothetical protein                                                      |       |       | -3.33  |
| RMQ10481 | hypothetical protein                                                      |       |       | -4.42  |
| RMQ10482 | conserved protein of unknown function                                     |       |       | -3.03  |
| RMQ10483 | conserved protein of unknown function                                     |       |       | -3.41  |
| RMQ10484 | hypothetical protein                                                      |       |       | -2.88  |
| RMQ10487 | intergenic region                                                         |       |       | -4.18  |
| RMQ10592 | not present in the current version of the genome                          |       |       | 4.76   |
| RMQ10593 | not present in the current version of the genome                          |       |       | 37.70  |
| RMQ10620 | putative transcriptional regulator, AraC family                           | 3.75  |       |        |
| RMQ10624 | conserved protein of unknown function                                     | 2.06  |       |        |
| RMQ10652 | hypothetical protein                                                      |       |       | -2.53  |
| RMQ10695 | not present in the current version of the genome                          |       |       | 6.16   |
| RMQ10772 | not present in the current version of the genome                          |       |       | -2.01  |
| RMQ10805 | not present in the current version of the genome                          | 3.71  |       |        |
| RMQ10875 | transposase of ISMex4, IS1380 family                                      | 2.86  |       |        |
| RMQ10891 | putative oxidoreductase, aldo/keto reductase precursor                    |       |       | -2.62  |
| RMQ10892 | not present in the current version of the genome                          |       |       | 4.83   |
| RMQ10988 | DNA excision repair enzyme subunit, with UvrBC                            | 2.17  |       |        |
| RMQ11017 | putative MscS mechanosensitive ion channel                                |       |       | -3.26  |
| RMQ11238 | putative 2-hydroxy-3-oxopropionate reductase, homolog <i>garR</i>         | 3.00  |       | -2.84  |
| RMQ11282 | conserved exported protein of unknown function                            |       |       | -3.55  |
| RMQ11337 | quinoprotein ethanol dehydrogenase precursor (QEDH)                       |       |       | 2.76   |
| RMQ11357 | conserved protein of unknown function                                     | 5.70  |       | -11.83 |
| RMQ11468 | putative oxidoreductase, xanthine dehydrogenase, FAD-binding subunit      |       |       | -3.14  |
| RMQ11528 | pyruvate dehydrogenase/oxidase: FAD- and thiamin PPI-binding, <i>poxB</i> | 3.07  |       | -5.97  |
| RMQ11705 | intergenic region                                                         | -2.37 |       |        |
| RMQ11744 | conserved protein of unknown function                                     | 2.96  |       | -2.63  |
| RMQ11764 | conserved exported protein of unknown function                            | 47.97 |       | -9.93  |

|                   |                                                                              |       |        |       |
|-------------------|------------------------------------------------------------------------------|-------|--------|-------|
| RMQ11768          | RMQ11766, opposite                                                           | 5.71  | -4.24  |       |
| RMQ11788          | conserved protein of unknown function                                        |       | -3.81  |       |
| RMQ11790          | conserved exported protein of unknown function                               | 2.70  |        |       |
| RMQ11817          | intergenic region                                                            |       | -2.71  |       |
| RMQ11831          | conserved exported protein of unknown function                               |       | -3.10  |       |
| RMQ11895          | conserved protein of unknown function                                        | 3.06  |        |       |
| RMQ12010          | putative RNA polymerase sigma 32 subunit, RpoH, stress response sigma factor | 8.96  | -4.31  | -7.98 |
| RMQ12024          | conserved protein of unknown function                                        |       | -4.36  |       |
| RMQ12094          | conserved protein of unknown function                                        | 8.09  | -5.63  |       |
| RMQ12134          | conserved protein of unknown function                                        | 4.17  |        |       |
| RMQ12156          | conserved exported protein of unknown function                               | 3.41  | -2.77  |       |
| RMQ12169/RMQ05822 | putative molybdopterin binding, CinA-related                                 | 3.98  | -2.89  |       |
| RMQ12197          | putative xenobiotic reductase, homolog <i>xenA</i>                           | 3.26  |        |       |
| RMQ12224          | conserved protein of unknown function                                        | 22.37 | -6.01  | -7.80 |
| RMQ12261          | intergenic region                                                            | -2.58 |        |       |
| RMQ12283          | conserved protein of unknown function                                        | 13.72 | -4.61  |       |
| RMQ12284          | intergenic region                                                            | 7.81  | -3.53  |       |
| RMQ12326          | conserved protein of unknown function                                        | 2.60  |        |       |
| RMQ12328          | MxaC protein                                                                 |       | 3.86   |       |
| RMQ12329          | MxaK protein precursor                                                       |       | 3.67   |       |
| RMQ12330          | MxaE                                                                         |       | 3.05   |       |
| RMQ12368          | conserved exported protein of unknown function                               | 13.55 | -3.02  |       |
| RMQ12453          | conserved exported protein of unknown function                               | 9.77  | -4.64  | -4.54 |
| RMQ12467          | putative oxidoreductase with molybdenum-binding domain; <i>yagR</i> homolog  |       | -2.89  |       |
| RMQ12639          | conserved protein of unknown function                                        |       | -2.70  |       |
| RMQ12645          | intergenic region                                                            |       | -2.58  |       |
| RMQ12685          | putative asparagine synthase, glutamine-hydrolyzing                          | 2.33  | -3.31  |       |
| RMQ12782          | conserved protein of unknown function                                        | 3.15  |        |       |
| RMQ12793          | NepR                                                                         |       | 190.20 | -5.28 |
| RMQ12794          | conserved exported protein of unknown function                               | 22.28 |        |       |
| RMQ12933          | conserved protein of unknown function                                        |       | -3.84  |       |
| RMQ12963          | hypothetical protein                                                         |       | -5.63  |       |
| RMQ12964          | intergenic region                                                            |       | -7.11  |       |
| RMQ15762          | coenzyme PQQ synthesis protein A                                             |       | 3.31   |       |

- a. In cases several probes corresponded to the same genes, they are indicated as the same entry and different colors are used to indicate fold change throughout the different experiments.
- b. Annotations are based on the current unpublished version of the genome.
- c. Average changes in three experiments. If the fold change is less than 1, the opposite of inverse ratio is indicated
