# Supplementary material
Source: PubMed Central journal article supplement (PMC2651336)
Supplement: 0810291106_SD2_PDF.pdf [file 0810291106_SD2_PDF.pdf]

**Table S2.** Bacterial strains and plasmids used in this study

|                            | Relevant characteristics                                                                                                                                                   | Source or reference |
|----------------------------|----------------------------------------------------------------------------------------------------------------------------------------------------------------------------|---------------------|
| <b>Strains</b>             |                                                                                                                                                                            |                     |
| <i>M. extorquens</i>       |                                                                                                                                                                            |                     |
| AM1                        | Wild type                                                                                                                                                                  | Lab strain          |
| $\Delta phyR::kanR$        | Deletion mutant of the <i>phyR</i> gene                                                                                                                                    | (2)                 |
| <i>AecfG1</i>              | Deletion mutant of the <i>ecfG1</i> gene using the vector pCM433-ecfG1                                                                                                     | This study          |
| <i>E. coli</i>             |                                                                                                                                                                            |                     |
| DH5 $\alpha$               | <i>supE44 <math>\Delta lacU169</math> (<math>\phi 80lacZDM15</math>) <i>hsdR17 recA1 endA1 gyrA96 thi-1 relA1</i></i>                                                      | Invitrogen          |
| BL21(DE3)                  | <i>ompT hsdS<sub>B</sub>(<math>\tau_B</math> m<sub>B</sub>) gal dcm</i> (DE3)                                                                                              | Invitrogen          |
| <b>Plasmids</b>            |                                                                                                                                                                            |                     |
| pCM62                      | Tc <sup>R</sup> ; <i>M. extorquens/E. coli</i> shuttle vector (P <sub>lac</sub> )                                                                                          | (1)                 |
| pCM62-phyR                 | Tc <sup>R</sup> ; pCM62 derivative containing <i>phyR</i>                                                                                                                  | This study          |
| pCM62-phyRD190A            | Tc <sup>R</sup> ; pCM62 derivative containing <i>phyR</i> D190A                                                                                                            | This study          |
| pCM80                      | Tc <sup>R</sup> ; <i>M. extorquens/E. coli</i> shuttle vector for expression of genes under the control of the <i>mxoF</i> promoter (P <sub>lac</sub> -P <sub>mxoF</sub> ) | (1)                 |
| pCM80-phyR                 | Tc <sup>R</sup> ; pCM80 derivative containing <i>phyR</i>                                                                                                                  | This study          |
| pCM80-phyRNterm            | Tc <sup>R</sup> ; pCM80 derivative containing the ECF sigma factor like domain-encoding part of <i>phyR</i>                                                                | This study          |
| pCM80-nepR                 | Tc <sup>R</sup> ; pCM80 derivative containing <i>nepR</i>                                                                                                                  | This study          |
| pCM80-nepR-his             | Tc <sup>R</sup> ; pCM80 derivative for production of NepR with a C-terminal hexahistidine tag                                                                              | This study          |
| pCM433                     | Ap <sup>R</sup> , Cm <sup>R</sup> , Tc <sup>R</sup> ; broad-host-range <i>sacB</i> -based allelic exchange vector                                                          |                     |
| pCM433-ecfG1               | Ap <sup>R</sup> , Cm <sup>R</sup> , Tc <sup>R</sup> ; pCM433 derivative used for the deletion of <i>ecfG1</i>                                                              | This study          |
| pET16b                     | Amp <sup>R</sup> ; vector for production of recombinant protein in <i>E. coli</i> adding an N-terminal decahistidine tag                                                   | Novagen             |
| pET16b-nepR                | Amp <sup>R</sup> ; vector for production of NepR                                                                                                                           | This study          |
| pET16b-ecfG1 $\Delta$ 1-64 | Amp <sup>R</sup> ; vector for production of $\sigma^{EcfG1} \Delta 1-64$                                                                                                   | This study          |
| pET24b                     | Kan <sup>R</sup> ; vector for production of recombinant protein in <i>E. coli</i> adding a C-terminal hexahistidine tag                                                    | Novagen             |
| pET24b-phyR                | Kan <sup>R</sup> ; pET24b derivative for production of PhyR with a C-terminal hexahistidine tag                                                                            | This study          |
| pET101/D-TOPO              | Amp <sup>R</sup> ; linearized, topoisomerase I-activated vector for production of recombinant protein with a C-terminal hexahistidine tag in <i>E. coli</i>                | Invitrogen          |
| pET101-phyRD190A           | Amp <sup>R</sup> ; vector for production of the PhyR D190A mutant                                                                                                          | This study          |
| pET101-phyRNterm           | Amp <sup>R</sup> ; vector for production of the N-terminal ECF domain of PhyR                                                                                              | This study          |
